# Supplementary material
Source: PubMed Central journal article supplement (PMC3927794)
Supplement: NIHMS528571-supplement-Supplementary_tables.pdf [file NIHMS528571-supplement-Supplementary_tables.pdf]

## Stage I: Binning Dashboard

Next Generation Sequencing (NGS) for Adults

\*Non-diagnostic, excludes newborn screening & prenatal testing/screening

GENE/GENE PANEL:

CONDITION:

### ACTIONABILITY

1. Is there a practice guideline or systematic review for the genetic condition?

YES  NO (STOP)

2. Does the practice guideline or systematic review indicate that the result is actionable in one or more of the following ways?

| Yes                      | No                       |                           |
|--------------------------|--------------------------|---------------------------|
| <input type="checkbox"/> | <input type="checkbox"/> | Patient Management        |
| <input type="checkbox"/> | <input type="checkbox"/> | Surveillance or Screening |
| <input type="checkbox"/> | <input type="checkbox"/> | Family Management         |
| <input type="checkbox"/> | <input type="checkbox"/> | Circumstances to Avoid    |

YES ( $\geq 1$  of above)  NO (STOP)

3. Is the result actionable in an undiagnosed adult with the genetic condition?

YES  NO (STOP)

### PENETRANCE

4. Is there at least one known pathogenic variant with at least moderate penetrance ( $\geq 40\%$ ) or moderate relative risk ( $\geq 2$ ) in any population?

YES  NO (STOP)

### SIGNIFICANCE/BURDEN OF DISEASE

5. Is this condition an important health problem?

YES  NO (STOP)

**ACTIONABILITY, PENETRANCE, AND SIGNIFICANCE/BURDEN Must ALL be "YES" to continue**

## Stage II: Binning Summary

Next Generation Sequencing (NGS) for Adults

\*Non-diagnostic, excludes newborn screening & prenatal testing/screening

| GENE/GENE PANEL:                                                                                      |                                                                    | CONDITION: |                                                                                                                                                                        |
|-------------------------------------------------------------------------------------------------------|--------------------------------------------------------------------|------------|------------------------------------------------------------------------------------------------------------------------------------------------------------------------|
| Topic                                                                                                 | Narrative Description of Evidence (Include Tier for Questions 2-5) | Ref        | Judgment                                                                                                                                                               |
| <b>1. What is the nature of the threat to health for an individual carrying a deleterious allele?</b> |                                                                    |            |                                                                                                                                                                        |
| <b>Disease Incidence</b>                                                                              |                                                                    |            | <input type="checkbox"/> Known<br><input type="checkbox"/> Unknown                                                                                                     |
| <b>Disease prevalence</b>                                                                             |                                                                    |            | <input type="checkbox"/> Known<br><input type="checkbox"/> Unknown                                                                                                     |
| <b>Clinical Features</b><br>(Signs/symptoms)                                                          |                                                                    |            | <input type="checkbox"/> Known<br><input type="checkbox"/> Unknown                                                                                                     |
| <b>Natural History</b><br>(Important subgroups & survival/recovery)                                   |                                                                    |            | <input type="checkbox"/> Known<br><input type="checkbox"/> Unknown                                                                                                     |
| <b>Significance/Burden of Condition</b>                                                               |                                                                    |            | <input type="checkbox"/> Known<br><input type="checkbox"/> Unknown                                                                                                     |
| <b>2. How effective are interventions for preventing the harm?</b>                                    |                                                                    |            |                                                                                                                                                                        |
| <b>Patient Management</b>                                                                             | (Tier X)                                                           |            | <input type="checkbox"/> Highly Effective<br><input type="checkbox"/> Somewhat Effective<br><input type="checkbox"/> Not Effective<br><input type="checkbox"/> Unknown |
| <b>Surveillance</b>                                                                                   | (Tier X)                                                           |            | <input type="checkbox"/> Highly Effective<br><input type="checkbox"/> Somewhat Effective<br><input type="checkbox"/> Not Effective<br><input type="checkbox"/> Unknown |
| <b>Family management</b>                                                                              | (Tier X)                                                           |            | <input type="checkbox"/> Highly Effective<br><input type="checkbox"/> Somewhat Effective<br><input type="checkbox"/> Not Effective<br><input type="checkbox"/> Unknown |
| <b>Circumstances to Avoid</b>                                                                         | (Tier X)                                                           |            | <input type="checkbox"/> Highly Effective<br><input type="checkbox"/> Somewhat Effective<br><input type="checkbox"/> Not Effective<br><input type="checkbox"/> Unknown |

## Stage II: Binning Summary

Next Generation Sequencing (NGS) for Adults

\*Non-diagnostic, excludes newborn screening & prenatal testing/screening

| GENE/GENE PANEL:                                                                                                    |                                                                    | CONDITION: |                                                                                                                                                               |
|---------------------------------------------------------------------------------------------------------------------|--------------------------------------------------------------------|------------|---------------------------------------------------------------------------------------------------------------------------------------------------------------|
| Topic                                                                                                               | Narrative Description of Evidence (Include Tier for Questions 2-5) | Ref        | Judgment                                                                                                                                                      |
| <b>3. What is the chance that this threat will materialize?</b>                                                     |                                                                    |            |                                                                                                                                                               |
| <b>Prevalence</b>                                                                                                   | (Tier X)                                                           |            | <input type="checkbox"/> Known<br><input type="checkbox"/> Unknown                                                                                            |
| <b>Penetrance</b>                                                                                                   | (Tier X)                                                           |            | <input type="checkbox"/> High (>60%)<br><input type="checkbox"/> Moderate (40-60%)<br><input type="checkbox"/> Low (<40%)<br><input type="checkbox"/> Unknown |
| <b>OR</b>                                                                                                           |                                                                    |            |                                                                                                                                                               |
| <b>Relative Risk</b><br>(include any high risk racial or ethnic subgroups)                                          | (Tier X)                                                           |            | <input type="checkbox"/> High (>3)<br><input type="checkbox"/> Moderate (2-3)<br><input type="checkbox"/> Low (<2)<br><input type="checkbox"/> Unknown        |
| <b>Expressivity</b>                                                                                                 | (Tier X)                                                           |            | <input type="checkbox"/> Known<br><input type="checkbox"/> Unknown                                                                                            |
| <b>4. How acceptable are the interventions in terms of the burdens or risks placed on the individual?</b>           |                                                                    |            |                                                                                                                                                               |
| <b>Acceptability of Intervention</b>                                                                                | (Tier X)                                                           |            | <input type="checkbox"/> Very Acceptable<br><input type="checkbox"/> Mildly Acceptable<br><input type="checkbox"/> Risky or problematic                       |
| <b>5. Would the underlying risk or condition escape detection prior to harm in the setting of recommended care?</b> |                                                                    |            |                                                                                                                                                               |
| <b>Chance to escape clinical detection in Adults</b>                                                                | (Tier X)                                                           |            | <input type="checkbox"/> Often<br><input type="checkbox"/> Sometimes<br><input type="checkbox"/> Rarely<br><input type="checkbox"/> Unknown                   |

### AAT Summary

**Recommendation:**

**Rationale:**

#### **References**

Blank Template

## Stage I: Binning Dashboard

Next Generation Sequencing (NGS) for Adults

\*Non-diagnostic, excludes newborn screening & prenatal testing/screening

GENE/GENE PANEL: APC

CONDITION: Familial Adenomatous Polyposis (FAP)

### ACTIONABILITY

1. Is there a practice guideline or systematic review for the genetic condition?

YES  NO (STOP)

2. Does the practice guideline or systematic review indicate that the result is actionable in one or more of the following ways?

| Yes                                 | No                                  |                           |
|-------------------------------------|-------------------------------------|---------------------------|
| <input checked="" type="checkbox"/> | <input type="checkbox"/>            | Patient Management        |
| <input checked="" type="checkbox"/> | <input type="checkbox"/>            | Surveillance or Screening |
| <input checked="" type="checkbox"/> | <input type="checkbox"/>            | Family Management         |
| <input type="checkbox"/>            | <input checked="" type="checkbox"/> | Circumstances to Avoid    |

YES ( $\geq 1$  of above)  NO (STOP)

3. Is the result actionable in an undiagnosed adult with the genetic condition?

YES  NO (STOP)

### PENETRANCE

4. Is there at least one known pathogenic variant with at least moderate penetrance ( $\geq 40\%$ ) or moderate relative risk ( $\geq 2$ ) in any population?

YES  NO (STOP)

### SIGNIFICANCE/BURDEN OF DISEASE

5. Is this condition an important health problem?

YES  NO (STOP)

**ACTIONABILITY, PENETRANCE, AND SIGNIFICANCE/BURDEN Must ALL be "YES" to continue**

## Stage II: Binning Summary

### Next Generation Sequencing (NGS) for Adults

\*Non-diagnostic, excludes newborn screening & prenatal testing/screening

| GENE: APC                                                                                             |                                                                                                                                                                                                                                                                                                                                                                                                                                                                                                                         | CONDITION: Familial Adenomatous Polyposis (FAP) |                                                                                                                                                                                   |
|-------------------------------------------------------------------------------------------------------|-------------------------------------------------------------------------------------------------------------------------------------------------------------------------------------------------------------------------------------------------------------------------------------------------------------------------------------------------------------------------------------------------------------------------------------------------------------------------------------------------------------------------|-------------------------------------------------|-----------------------------------------------------------------------------------------------------------------------------------------------------------------------------------|
| Topic                                                                                                 | Narrative Description of Evidence (Include Tier for Questions 2-5)                                                                                                                                                                                                                                                                                                                                                                                                                                                      | Ref                                             | Judgment                                                                                                                                                                          |
| <b>1. What is the nature of the threat to health for an individual carrying a deleterious allele?</b> |                                                                                                                                                                                                                                                                                                                                                                                                                                                                                                                         |                                                 |                                                                                                                                                                                   |
| <b>Disease Incidence</b>                                                                              | Age adjusted incidence rate for colorectal cancer (CRC) is 46.3 per 100,000 men and women per year. It is estimated that 143,460 men and women will be diagnosed with and 51,690 will die of CRC in 2012. FAP accounts for <1% of the annual CRC burden                                                                                                                                                                                                                                                                 | 1,4                                             | <input checked="" type="checkbox"/> Known<br><input type="checkbox"/> Unknown                                                                                                     |
| <b>Disease prevalence</b>                                                                             | Based on rates from 2007-2009, 1 in 20 men and women born today will be diagnosed with CRC during their lifetime. On January 1, 2009, there were about 1,140,000 men & women alive with a history of CRC.                                                                                                                                                                                                                                                                                                               | 1,4                                             | <input checked="" type="checkbox"/> Known<br><input type="checkbox"/> Unknown                                                                                                     |
| <b>Clinical Features</b><br>(Signs/symptoms)                                                          | Clinical FAP is classically diagnosed as having > 100 adenomas. In virtually all patients, at least one of these adenomas will eventually progress to colon cancer. Extracolonic features include increased risk of desmoid tumors and duodenal cancer.                                                                                                                                                                                                                                                                 | 8                                               | <input checked="" type="checkbox"/> Known<br><input type="checkbox"/> Unknown                                                                                                     |
| <b>Natural History</b><br>(Important subgroups & survival/recovery)                                   | In the absence of surgical intervention, virtually all individuals with FAP will develop colon cancer with an average age of onset of 40-50 years of age, with some individuals developing cancer as young as 12-15 years of age.                                                                                                                                                                                                                                                                                       | 8                                               | <input checked="" type="checkbox"/> Known<br><input type="checkbox"/> Unknown                                                                                                     |
| <b>Significance/Burden of Condition</b>                                                               | The 5-year relative survival (compared to a general population) was 90% for localized, 70% for regional, and 12% for distant CRC; overall across all disease stages 5-year relative survival was 64.3%.                                                                                                                                                                                                                                                                                                                 | 1,2<br>,4                                       | <input checked="" type="checkbox"/> Known<br><input type="checkbox"/> Unknown                                                                                                     |
| <b>2. How effective are interventions for preventing the harm?</b>                                    |                                                                                                                                                                                                                                                                                                                                                                                                                                                                                                                         |                                                 |                                                                                                                                                                                   |
| <b>Patient Management</b>                                                                             | <p>Central registration and prophylactic colectomy or proctocolectomy performed when number of adenomas reaches 20 or 30, or become symptomatic has been shown to reduce overall and colon-cancer-related mortality in patients with FAP in at least 3 studies. <b>(Tier 2)</b></p> <p>Removal of desmoid and duodenal tumors confers an additional benefit <b>(Tier 3)</b>.</p> <p>Some patients benefit from treatment with NSAIDs. <b>(Tier 3)</b></p>                                                               | 4,8<br><br>1,8<br><br>1,8                       | <input checked="" type="checkbox"/> Highly Effective<br><input type="checkbox"/> Somewhat Effective<br><input type="checkbox"/> Not Effective<br><input type="checkbox"/> Unknown |
| <b>Surveillance</b>                                                                                   | <p>Pre-colectomy surveillance – sigmoidoscopy every 1-2 years starting at age 10-12 years has been shown to reduce FAP mortality. <b>(Tier 2)</b></p> <p>Post-colectomy surveillance includes annual sigmoidoscopy in those with retained rectum, upper endoscopy every 1-3 years depending on polyp burden, annual thyroid examination, and annual abdominal examination plus possible imaging studies (CT or MRI) if family has a history of desmoid tumors <b>(Tier 2)</b></p>                                       | 4,8<br><br>4                                    | <input checked="" type="checkbox"/> Highly Effective<br><input type="checkbox"/> Somewhat Effective<br><input type="checkbox"/> Not Effective<br><input type="checkbox"/> Unknown |
| <b>Family management</b>                                                                              | Early recognition may allow for timely intervention and improve final outcome; genetic testing is more cost effective than sigmoidoscopy in determining who in the family is affected. <sup>16</sup> Surveillance (described above) is recommended for individuals with a known APC mutation, individuals at risk for FAP who have not undergone molecular genetic testing, and individuals who are members of families in which molecular genetic testing did not identify a disease-causing mutation. <b>(Tier 3)</b> | 1                                               | <input type="checkbox"/> Highly Effective<br><input checked="" type="checkbox"/> Somewhat Effective<br><input type="checkbox"/> Not Effective<br><input type="checkbox"/> Unknown |
| <b>Circumstances to Avoid</b>                                                                         |                                                                                                                                                                                                                                                                                                                                                                                                                                                                                                                         |                                                 | <input type="checkbox"/> Highly Effective<br><input type="checkbox"/> Somewhat Effective<br><input type="checkbox"/> Not Effective<br><input checked="" type="checkbox"/> Unknown |

## Stage II: Binning Summary

### Next Generation Sequencing (NGS) for Adults

\*Non-diagnostic, excludes newborn screening & prenatal testing/screening

| GENE: APC                                                                                                           |                                                                                                                                                                                                                                                                                                                 | CONDITION: Familial Adenomatous Polyposis (FAP) |                                                                                                                                                                          |
|---------------------------------------------------------------------------------------------------------------------|-----------------------------------------------------------------------------------------------------------------------------------------------------------------------------------------------------------------------------------------------------------------------------------------------------------------|-------------------------------------------------|--------------------------------------------------------------------------------------------------------------------------------------------------------------------------|
| Topic                                                                                                               | Narrative Description of Evidence (Include Tier for Questions 2-5)                                                                                                                                                                                                                                              | Ref                                             | Judgment                                                                                                                                                                 |
| <b>3. What is the chance that this threat will materialize?</b>                                                     |                                                                                                                                                                                                                                                                                                                 |                                                 |                                                                                                                                                                          |
| <b>Prevalence</b>                                                                                                   | Estimates range from 2 to 10 per 100,000, with 15 – 25% of cases resulting from a <i>de novo</i> mutation. <b>(Tier 2)</b>                                                                                                                                                                                      | 1,8                                             | <input checked="" type="checkbox"/> Known<br><input type="checkbox"/> Unknown                                                                                            |
| <b>Penetrance</b>                                                                                                   | Penetrance is virtually 100% for occurrence of colon cancer. <b>(Tier 2)</b>                                                                                                                                                                                                                                    | 1,2                                             | <input checked="" type="checkbox"/> High (>60%)<br><input type="checkbox"/> Moderate (40-60%)<br><input type="checkbox"/> Low (<40%)<br><input type="checkbox"/> Unknown |
| <b>OR</b>                                                                                                           |                                                                                                                                                                                                                                                                                                                 |                                                 |                                                                                                                                                                          |
| <b>Relative Risk</b><br>(include any high risk racial or ethnic subgroups)                                          |                                                                                                                                                                                                                                                                                                                 |                                                 | <input type="checkbox"/> High (>3)<br><input type="checkbox"/> Moderate (2-3)<br><input type="checkbox"/> Low (<2)<br><input type="checkbox"/> Unknown                   |
| <b>Expressivity</b>                                                                                                 | Polyps begin to appear at variable ages, ranging from teens to sixties, with an average age of first polyps at 16. It has recently been reported that as many as 15% of patients with FAP display mosaicism. <b>(Tier 3)</b>                                                                                    | 1,8                                             | <input checked="" type="checkbox"/> Known<br><input type="checkbox"/> Unknown                                                                                            |
| <b>4. How acceptable are the interventions in terms of the burdens or risks placed on the individual?</b>           |                                                                                                                                                                                                                                                                                                                 |                                                 |                                                                                                                                                                          |
| <b>Acceptability of Intervention</b>                                                                                | Colectomy or proctocolectomy can result in hemorrhage, loss of fertility, sexual dysfunction, increased fecal frequency and urgency, incontinence, dietary restriction and post-surgical complications. 3-28% of patients require re-operation within 30 days. Some patients require an ostomy. <b>(Tier 2)</b> | 1,4<br>,8                                       | <input type="checkbox"/> Very Acceptable<br><input type="checkbox"/> Mildly Acceptable<br><input checked="" type="checkbox"/> Risky or problematic                       |
| <b>5. Would the underlying risk or condition escape detection prior to harm in the setting of recommended care?</b> |                                                                                                                                                                                                                                                                                                                 |                                                 |                                                                                                                                                                          |
| <b>Chance to escape clinical detection in Adults</b>                                                                | Colon cancers resulting from FAP are aggressive and the incidence of cancer is not 100% predictable from polyp burden or other available clinical features. Even with an annual sigmoidoscopy, it is possible for patients to progress from cancer-free to terminal cancer between screenings. <b>(Tier 3)</b>  | 8                                               | <input type="checkbox"/> Often<br><input checked="" type="checkbox"/> Sometimes<br><input type="checkbox"/> Rarely<br><input type="checkbox"/> Unknown                   |

### FAP Summary

**Recommendation:** Routinely report as a clinically actionable incidental finding.

**Rationale:** A significant disease burden is associated with FAP. Although there are risks associated with the interventions for FAP, these are outweighed by the potential benefits from surveillance and risk-reducing surgeries for the individual and their family members. This summary is limited to mutations consistent with classic FAP.

## Stage II: Binning Summary

### Next Generation Sequencing (NGS) for Adults

**\*Non-diagnostic, excludes newborn screening & prenatal testing/screening**

#### References

<sup>1</sup>Genetest: <http://www.ncbi.nlm.nih.gov/books/NBK1345/>

<sup>2</sup>OrphaNet: <http://tinyurl.com/c5xohda>

<sup>3</sup>Gene Card: <http://www.nature.com/ejhg/journal/v19/n7/full/ejhg20117a.html>

<sup>4</sup> Burt RW, Barthel JS, Dunn KB, David DS, Drelichman E, Ford JM, Giardiello FM, Gruber SB, Halverson AL, Hamilton SR, Ismail MK, Jasperson K, Lazenby AJ, Lynch PM, Martin EW Jr, Mayer RJ, Ness RM, Provenzale D, Rao MS, Shike M, Steinbach G, Terdiman JP, Weinberg D. Colorectal cancer screening clinical practice guidelines in oncology. National Comprehensive Cancer Network. Available online. 2010. Accessed 10-25-11.

<sup>5</sup> Scottish Intercollegiate Guidelines Network (SIGN). Diagnosis and management of colorectal cancer. A national clinical guideline. Edinburgh (Scotland): Scottish Intercollegiate Guidelines Network (SIGN); 2011 Dec.

<sup>6</sup> Institute for Clinical Systems Improvement (ICSI). Colorectal cancer screening. Bloomington (MN): Institute for Clinical Systems Improvement (ICSI); 2012

<sup>7</sup> National Institute for Health and Clinical Excellence (NICE). Colonoscopic surveillance for prevention of colorectal cancer in people with ulcerative colitis, Crohn's disease or adenomas. London (UK): National Institute for Health and Clinical Excellence (NICE); 2011 Mar. 116 p. (Clinical guideline; no. 118).

<sup>8</sup> Vasen HF, Möslein G, Alonso A, Aretz S, Bernstein I, Bertario L, Blanco I, Bülow S, Burn J, Capella G, Colas C, Engel C, Frayling I, Friedl W, Hes FJ, Hodgson S, Järvinen H, Mecklin JP, Møller P, Myrthøi T, Nagengast FM, Parc Y, Phillips R, Clark SK, de Leon MP, Renkonen-Sinisalo L, Sampson JR, Stormorken A, Tejpar S, Thomas HJ, Wijnen J. Guidelines for the clinical management of familial adenomatous polyposis (FAP). Gut. 2008 May;57(5):704-13. Epub 2008 Jan 14. PMID: 18194984

## Stage I: Binning Dashboard

Next Generation Sequencing (NGS) for Adults

\*Non-diagnostic, excludes newborn screening & prenatal testing/screening

GENE/GENE PANEL: SERPINA1

CONDITION:  $\alpha$ 1-antitrypsin (AAT) deficiency

### ACTIONABILITY

1. Is there a practice guideline or systematic review for the genetic condition?

YES  NO (STOP)

2. Does the practice guideline or systematic review indicate that the result is actionable in one or more of the following ways?

| Yes                                                          | No                                  |                                    |
|--------------------------------------------------------------|-------------------------------------|------------------------------------|
| <input checked="" type="checkbox"/>                          | <input type="checkbox"/>            | Patient Management                 |
| <input checked="" type="checkbox"/>                          | <input type="checkbox"/>            | Surveillance or Screening          |
| <input type="checkbox"/>                                     | <input checked="" type="checkbox"/> | Family Management                  |
| <input checked="" type="checkbox"/>                          | <input type="checkbox"/>            | Circumstances to Avoid             |
| <input checked="" type="checkbox"/> YES ( $\geq 1$ of above) |                                     | <input type="checkbox"/> NO (STOP) |

3. Is the result actionable in an undiagnosed adult with the genetic condition?

YES  NO (STOP)

### PENETRANCE

4. Is there at least one known pathogenic variant with at least moderate penetrance ( $\geq 40\%$ ) or moderate relative risk ( $\geq 2$ ) in any population?

YES  NO (STOP)

### SIGNIFICANCE/BURDEN OF DISEASE

5. Is this condition an important health problem?

YES  NO (STOP)

**ACTIONABILITY, PENETRANCE, AND SIGNIFICANCE/BURDEN Must ALL be "YES" to continue**



## Stage II: Binning Summary

### Next Generation Sequencing (NGS) for Adults

\*Non-diagnostic, excludes newborn screening & prenatal testing/screening

| GENE/GENE PANEL: SERPINA1                                                                             |                                                                                                                                                                                                                                                                                                                                                                                                                                                                                                  | CONDITION: $\alpha$ 1-antitrypsin (AAT) deficiency |                                                                                                                                                                                   |
|-------------------------------------------------------------------------------------------------------|--------------------------------------------------------------------------------------------------------------------------------------------------------------------------------------------------------------------------------------------------------------------------------------------------------------------------------------------------------------------------------------------------------------------------------------------------------------------------------------------------|----------------------------------------------------|-----------------------------------------------------------------------------------------------------------------------------------------------------------------------------------|
| Topic                                                                                                 | Narrative Description of Evidence (Include Tier for Questions 2-5)                                                                                                                                                                                                                                                                                                                                                                                                                               | Ref                                                | Judgment                                                                                                                                                                          |
| <b>1. What is the nature of the threat to health for an individual carrying a deleterious allele?</b> |                                                                                                                                                                                                                                                                                                                                                                                                                                                                                                  |                                                    |                                                                                                                                                                                   |
| <b>Disease Incidence</b>                                                                              | The death rates for COPD are 46.4 per 100,000 for US men and 34.2 per 100,000 in US women.                                                                                                                                                                                                                                                                                                                                                                                                       | 1                                                  | <input checked="" type="checkbox"/> Known<br><input type="checkbox"/> Unknown                                                                                                     |
| <b>Disease prevalence</b>                                                                             | In 2009, 13.1 million U.S. adults > 18 years had COPD. AAT deficiency accounts for around 2% of cases of COPD. In Caucasians, the prevalence of AAT deficiency is 25 out of 10,000.                                                                                                                                                                                                                                                                                                              | 10<br>2<br>3                                       | <input checked="" type="checkbox"/> Known<br><input type="checkbox"/> Unknown                                                                                                     |
| <b>Clinical Features</b><br>(Signs/symptoms)                                                          | Severe AAT deficiency is characterized by a reduced serum level of AAT, and increased risk for developing early-onset pulmonary emphysema, and by an accumulation of polymers of the AAT within the hepatocytes which might promote liver disease.                                                                                                                                                                                                                                               | 4                                                  | <input checked="" type="checkbox"/> Known<br><input type="checkbox"/> Unknown                                                                                                     |
|                                                                                                       | COPD, specifically emphysema, is the most common clinical manifestation of AAT deficiency. The onset of disease in smokers is between 40-50 years. In non-smokers, the onset can be delayed to the sixth decade and is often associated with a normal life span.                                                                                                                                                                                                                                 | 5                                                  |                                                                                                                                                                                   |
|                                                                                                       | Cirrhosis and carcinoma of the liver affect about 30-40% of patients with AAT deficiency over the age of 50 years and are a significant cause of death in nonsmoking individuals with the PI ZZ phenotype.                                                                                                                                                                                                                                                                                       | 5                                                  |                                                                                                                                                                                   |
| <b>Natural History</b><br>(Important subgroups & survival/recovery)                                   | In the US the highest risk for AAT deficiency is found in Whites. The severity of airflow obstruction in AAT deficiency, age at presentation of respiratory symptoms, and physiologically demonstrable airflow obstruction vary widely. Several studies report early death of individuals with AAT deficiency-associated lung disease. Cirrhosis of the liver occurs in 5-15% of AAT deficient adults with higher figures for the elderly, particular never-smokers who escape severe emphysema. | 2<br>5                                             | <input checked="" type="checkbox"/> Known<br><input type="checkbox"/> Unknown                                                                                                     |
| <b>Significance/Burden of Condition</b>                                                               | AAT deficiency increases risk for serious conditions including COPD, and cirrhosis and carcinoma of the liver.                                                                                                                                                                                                                                                                                                                                                                                   | 5                                                  | <input checked="" type="checkbox"/> Known<br><input type="checkbox"/> Unknown                                                                                                     |
| <b>2. How effective are interventions for preventing the harm?</b>                                    |                                                                                                                                                                                                                                                                                                                                                                                                                                                                                                  |                                                    |                                                                                                                                                                                   |
| <b>Patient Management</b>                                                                             | Influenza and pneumococcal vaccination is recommended. <b>(Tier 1)</b><br>Testing for hepatitis serology is recommended. <b>(Tier 1)</b><br>Regular exercise, good nutrition, and vitamin E therapy are predicted to help prevent damage to the lungs. <b>(Tier 4)</b>                                                                                                                                                                                                                           | 5<br>5<br>6                                        | <input type="checkbox"/> Highly Effective<br><input checked="" type="checkbox"/> Somewhat Effective<br><input type="checkbox"/> Not Effective<br><input type="checkbox"/> Unknown |
| <b>Surveillance</b>                                                                                   | Surveillance for hepatocellular carcinoma is recommended in patients with AAT deficiency and cirrhosis. <b>(Tier 2)</b>                                                                                                                                                                                                                                                                                                                                                                          | 7                                                  | <input type="checkbox"/> Highly Effective<br><input checked="" type="checkbox"/> Somewhat Effective<br><input type="checkbox"/> Not Effective<br><input type="checkbox"/> Unknown |
|                                                                                                       | Elderly patients with AAT deficiency who lack liver symptoms should have regular assessment of simple liver function tests. <b>(Tier 1)</b>                                                                                                                                                                                                                                                                                                                                                      | 5                                                  |                                                                                                                                                                                   |
|                                                                                                       | Monitor patients with liver function tests & measurements. <b>(Tier 4)</b>                                                                                                                                                                                                                                                                                                                                                                                                                       | 6                                                  |                                                                                                                                                                                   |
| <b>Family management</b>                                                                              | Not applicable                                                                                                                                                                                                                                                                                                                                                                                                                                                                                   |                                                    |                                                                                                                                                                                   |
| <b>Circumstances to Avoid</b>                                                                         | Curtail cigarette smoking and eliminate environmental pollutants. Early cessation of smoking is particularly important in those with the homozygous phenotype. Minimize exposure to respiratory irritants such as second-hand tobacco smoke, dusts, and fumes. Avoid occupations where such exposure occurs frequently. <b>(Tier 1)</b><br>Patients should be urged to stop drinking alcohol. <b>(Tier 4)</b>                                                                                    | 5<br><br>8                                         | <input type="checkbox"/> Highly Effective<br><input checked="" type="checkbox"/> Somewhat Effective<br><input type="checkbox"/> Not Effective<br><input type="checkbox"/> Unknown |

## Stage II: Binning Summary

### Next Generation Sequencing (NGS) for Adults

\*Non-diagnostic, excludes newborn screening & prenatal testing/screening

| GENE/GENE PANEL: SERPINA1                                                                                           |                                                                                                                                                                                                                                                                                                                                                                                                                                                                                                                                                                                                                                   | CONDITION: $\alpha$ 1-antitrypsin (AAT) deficiency |                                                                                                                                                                          |
|---------------------------------------------------------------------------------------------------------------------|-----------------------------------------------------------------------------------------------------------------------------------------------------------------------------------------------------------------------------------------------------------------------------------------------------------------------------------------------------------------------------------------------------------------------------------------------------------------------------------------------------------------------------------------------------------------------------------------------------------------------------------|----------------------------------------------------|--------------------------------------------------------------------------------------------------------------------------------------------------------------------------|
| Topic                                                                                                               | Narrative Description of Evidence (Include Tier for Questions 2-5)                                                                                                                                                                                                                                                                                                                                                                                                                                                                                                                                                                | Ref                                                | Judgment                                                                                                                                                                 |
| <b>3. What is the chance that this threat will materialize?</b>                                                     |                                                                                                                                                                                                                                                                                                                                                                                                                                                                                                                                                                                                                                   |                                                    |                                                                                                                                                                          |
| <b>Prevalence</b>                                                                                                   | <p>A meta-analysis of the US based studies estimated the following frequencies:</p> <ul style="list-style-type: none"> <li>• PI S allele: 3.31%</li> <li>• PI Z allele: 1.2%</li> <li>• PI SZ heterozygotes: 0.08%</li> <li>• PI ZZ homozygotes: 0.014% <b>(Tier 1)</b></li> </ul>                                                                                                                                                                                                                                                                                                                                                | 4                                                  | <input checked="" type="checkbox"/> Known<br><input type="checkbox"/> Unknown                                                                                            |
| <b>Penetrance</b>                                                                                                   | <p>Penetrance of COPD is not properly known because many PI ZZ individuals are never identified. Screening studies in the US indicate that the prevalence of individuals with AAT deficiency is between 1 in 2, 857 and 1 in 5,097 which would expect 80,000 to 100,000 individuals with AAT (symptomatic and asymptomatic) in the US. Only 3,000-4,000 individuals have been diagnosed indicating that it undiagnosed or not manifested in a large proportion of the patients. <b>(Tier 1)</b></p>                                                                                                                               | 5                                                  | <input type="checkbox"/> High (>60%)<br><input type="checkbox"/> Moderate (40-60%)<br><input type="checkbox"/> Low (<40%)<br><input checked="" type="checkbox"/> Unknown |
| <b>OR</b>                                                                                                           |                                                                                                                                                                                                                                                                                                                                                                                                                                                                                                                                                                                                                                   |                                                    |                                                                                                                                                                          |
| <b>Relative Risk</b><br><small>(include any high risk racial or ethnic subgroups)</small>                           | <p>In a meta-analysis of studies comparing COPD in PI SZ compound heterozygotes, a three-fold elevation in COPD risk due to the PI SZ genotype was found. <b>(Tier 1)</b></p> <p>Homozygous PI ZZ confers a 20 times higher risk of chronic liver disease. <b>(Tier 1)</b></p>                                                                                                                                                                                                                                                                                                                                                    | 9<br><br>5                                         | <input checked="" type="checkbox"/> High (>3)<br><input type="checkbox"/> Moderate (2-3)<br><input type="checkbox"/> Low (<2)<br><input type="checkbox"/> Unknown        |
| <b>Expressivity</b>                                                                                                 | <p>There is considerable variation in the clinical manifestations produced by AAT deficiency, some patients have minimal or no symptoms and others develop severe emphysema at an early age. Smoking is the major factor in developing emphysema but some non-smokers develop airflow limitation in later life and this appears to be associated with a history of asthma or pneumonia. <b>(Tier 1)</b></p>                                                                                                                                                                                                                       | 3                                                  | <input type="checkbox"/> Known<br><input checked="" type="checkbox"/> Unknown                                                                                            |
| <b>4. How acceptable are the interventions in terms of the burdens or risks placed on the individual?</b>           |                                                                                                                                                                                                                                                                                                                                                                                                                                                                                                                                                                                                                                   |                                                    |                                                                                                                                                                          |
| <b>Acceptability of Intervention</b>                                                                                | Data not identified. However, harms would be limited to those associated with immunization and hepatocellular carcinoma screening.                                                                                                                                                                                                                                                                                                                                                                                                                                                                                                |                                                    | <input checked="" type="checkbox"/> Very Acceptable<br><input type="checkbox"/> Mildly Acceptable<br><input type="checkbox"/> Risky or problematic                       |
| <b>5. Would the underlying risk or condition escape detection prior to harm in the setting of recommended care?</b> |                                                                                                                                                                                                                                                                                                                                                                                                                                                                                                                                                                                                                                   |                                                    |                                                                                                                                                                          |
| <b>Chance to escape clinical detection in Adults</b>                                                                | <p>Symptomatic obstructive lung disease in AAT deficiency usual presents at a mean age between 32 and 41 years in individuals with a history of smoking. Considerable variability in the time of onset of symptoms has been described but symptoms rarely present before age 25 years. Although severe symptoms are most often seen in current or previous cigarette smokers, some smokers and many nonsmokers develop no symptoms at all. <b>(Tier 1)</b></p> <p>Nonsmoking individuals with the homozygous Z phenotype have a remarkably delayed onset of symptoms and some have an almost normal lifespan. <b>(Tier 1)</b></p> | 5<br><br>5                                         | <input type="checkbox"/> Often<br><input checked="" type="checkbox"/> Sometimes<br><input type="checkbox"/> Rarely<br><input type="checkbox"/> Unknown                   |

## Stage II: Binning Summary

### Next Generation Sequencing (NGS) for Adults

\*Non-diagnostic, excludes newborn screening & prenatal testing/screening

#### AAT Summary

**Recommendation:** Routinely report as a clinically actionable incidental finding.

**Rationale:** AAT deficiency can lead to very serious health conditions including COPD, cirrhosis and carcinoma of the liver. The penetrance is not well-understood, but based on prevalence estimates it may be significantly under-diagnosed or does not manifest in a large proportion of patients who carry a high risk genotype. Although the interventions are considered somewhat effective, a minority view was that the actions are not sufficiently different from recommendations for a general population (e.g., influenza vaccination, regular exercise, good nutrition, and smoking cessation), and the main benefit may be to motivate smoking cessation, although the effectiveness of using genetically identified risk information to promote this behavior change compared with other approaches is uncertain.

#### References

1. <http://www.cdc.gov/copd/data.htm>
2. Janciauskiene S, Ferrarotti I, Laenger F, Jonigk D, Luisetti M. Clinical utility gene card for:  $\alpha$ -1-antitrypsin deficiency. *Eur J Hum Genet.* 2011 May;19(5). PMID: 21248733
3. National Clinical Guideline Centre for Acute and Chronic Conditions. Chronic obstructive pulmonary disease. Management of chronic obstructive pulmonary disease in adults in primary and secondary care. London (UK): National Institute for Health and Clinical Excellence (NICE); 2010 Jun.
4. Blanco I, Bustillo EF, Rodriguez MC. Distribution of alpha1-antitrypsin PI S and PI Z frequencies in countries outside Europe: a meta-analysis. *Clin Genet.* 2001 Dec;60(6):431-41. PMID: 11846735
5. Society ATSER. American Thoracic Society/European Respiratory Society statement: standards for the diagnosis and management of individuals with alpha-1 antitrypsin deficiency. *Am J Respir Crit Care Med.* 2003;168:818-900. PMID: 14522813
6. Schlade-Bartusiak K, Cox DW. Alpha1-Antitrypsin Deficiency. In: Pagon RA, Bird TD, Dolan CR, Stephens K, Adam MP, editors. *GeneReviews™* [Internet]. Seattle (WA): University of Washington, Seattle; 1993-. 2006 Oct 27 [updated 2008 Feb 06]. PMID: 20301692
7. Bruix J, Sherman M. Management of hepatocellular carcinoma: an update. Alexandria (VA): American Association for the Study of Liver Diseases; 2010 Jul.
8. Fregones L, Stolk J. Hereditary alpha-1-antitrypsin deficiency and its clinical consequences. *Orphanet J Rare Dis.* 2008 Jun 19;3:16. Review. PMID: 18565211
9. Dahl M, Hersh CP, Ly NP, Berkey CS, Silverman EK, Nordestgaard BG. The protease inhibitor PI\*S allele and COPD: a meta-analysis. *Eur Respir J.* 2005 Jul;26(1):67-76. PMID: 15994391
10. Trends in COPD (Chronic Bronchitis and Emphysema): Morbidity and Mortality. American Lung Association. August 2011. <http://www.lung.org/finding-cures/our-research/trend-reports/copd-trend-report.pdf>

## Stage I: Binning Dashboard

Next Generation Sequencing (NGS) for Adults

\*Non-diagnostic, excludes newborn screening & prenatal testing/screening

GENE/GENE PANEL: HFE

CONDITION: HFE-associated Hereditary Hemochromatosis (HFE-HH)

### ACTIONABILITY

1. Is there a practice guideline or systematic review for the genetic condition?

YES

NO (STOP)

2. Does the practice guideline or systematic review indicate that the result is actionable in one or more of the following ways?

Yes

No



Patient Management



Surveillance or Screening



Family Management



Circumstances to Avoid

YES ( $\geq 1$  of above)

NO (STOP)

3. Is the result actionable in an undiagnosed adult with the genetic condition?

YES

NO (STOP)

### PENETRANCE

4. Is there at least one known pathogenic variant with at least moderate penetrance ( $\geq 40\%$ ) or moderate relative risk ( $\geq 2$ ) in any population?

YES

NO (STOP)

### SIGNIFICANCE/BURDEN OF DISEASE

5. Is this condition an important health problem?

YES

NO (STOP)

**ACTIONABILITY, PENETRANCE, AND SIGNIFICANCE/BURDEN Must ALL be "YES" to continue**

# Stage II: Binning Summary

## Next Generation Sequencing (NGS) for Adults

\*Non-diagnostic, excludes newborn screening & prenatal testing/screening

| GENE/GENE PANEL: HFE                                                                                  |                                                                                                                                                                                                                                                                                                                                                                                                                                                                                                                                                                                                                                                            | CONDITION: HFE-associated hereditary hemochromatosis (HFE-HH) |                                                                                                                                                                                   |
|-------------------------------------------------------------------------------------------------------|------------------------------------------------------------------------------------------------------------------------------------------------------------------------------------------------------------------------------------------------------------------------------------------------------------------------------------------------------------------------------------------------------------------------------------------------------------------------------------------------------------------------------------------------------------------------------------------------------------------------------------------------------------|---------------------------------------------------------------|-----------------------------------------------------------------------------------------------------------------------------------------------------------------------------------|
| Topic                                                                                                 | Narrative Description of Evidence (Include Tier for Questions 2-5)                                                                                                                                                                                                                                                                                                                                                                                                                                                                                                                                                                                         | Ref                                                           | Judgment                                                                                                                                                                          |
| <b>1. What is the nature of the threat to health for an individual carrying a deleterious allele?</b> |                                                                                                                                                                                                                                                                                                                                                                                                                                                                                                                                                                                                                                                            |                                                               |                                                                                                                                                                                   |
| <b>Disease Incidence</b>                                                                              | About 80,000 hemochromatosis or hemochromatosis-compatible disease hospitalizations (2.3 per 100,000 residents) in the US from 1979-1997. Of 29 million deaths from 1979-1992 4,848 (0.017%) were consistent with hemochromatosis as the underlying cause. Age-adjusted mortality rates for hemochromatosis-consistent death increased from 1.2 per million (1979) to 1.8 per million (1992).                                                                                                                                                                                                                                                              | 1                                                             | <input checked="" type="checkbox"/> Known<br><input type="checkbox"/> Unknown                                                                                                     |
| <b>Disease prevalence</b>                                                                             | The prevalence of HH in the primary care population is estimated 0.18-0.59%.                                                                                                                                                                                                                                                                                                                                                                                                                                                                                                                                                                               | 2                                                             | <input checked="" type="checkbox"/> Known<br><input type="checkbox"/> Unknown                                                                                                     |
| <b>Clinical Features</b><br>(Signs/symptoms)                                                          | HH is characterized by excessive intestinal absorption of iron with progressive abnormal deposition in various organs, such as the liver, heart, pancreas, joints, and skin.<br>Even in the absence of iron overload, iron accumulates when the liver is inflamed or cirrhotic. Cirrhosis is a late-stage disease development and has been reported to shorten life expectancy.<br>HFE-HH is defined as C282Y homozygosity and increased body iron stores with or without clinical symptoms.                                                                                                                                                               | 3<br><br>1<br><br>4                                           | <input checked="" type="checkbox"/> Known<br><input type="checkbox"/> Unknown                                                                                                     |
| <b>Natural History</b><br>(Important subgroups & survival/recovery)                                   | Clinically recognized HH is twice as common in males and occurs mostly in white populations. The condition has a long latent period with wide individual variation in expression. Iron accumulation and disease expression are modified by factors such as blood loss from menstruation or donation, alcohol intake, diet, and comorbid disease (e.g., viral hepatitis). Age of onset is delayed in females.                                                                                                                                                                                                                                               | 1                                                             | <input checked="" type="checkbox"/> Known<br><input type="checkbox"/> Unknown                                                                                                     |
| <b>Significance/Burden of Condition</b>                                                               | The pathophysiologic predisposition to dietary iron absorption may lead to the development of life-threatening complications of cirrhosis, hepatocellular carcinoma, diabetes, and heart disease.                                                                                                                                                                                                                                                                                                                                                                                                                                                          | 5                                                             | <input checked="" type="checkbox"/> Known<br><input type="checkbox"/> Unknown                                                                                                     |
| <b>2. How effective are interventions for preventing the harm?</b>                                    |                                                                                                                                                                                                                                                                                                                                                                                                                                                                                                                                                                                                                                                            |                                                               |                                                                                                                                                                                   |
| <b>Patient Management</b>                                                                             | <u>Patients with increased iron stores</u><br><ul style="list-style-type: none"> <li>Patients could be immunized against hepatitis A and B. <b>(Tier 1)</b></li> <li>Patients should be treated with phlebotomy. <b>(Tier 1)</b></li> <li>Liver biopsy offered to C282Y/C282Y patients with ferritin above 1000 ug/L, elevated AST, hepatomegaly, or age &gt; 40 years. <b>(Tier 1)</b></li> <li>Liver biopsy to stage liver disease in compound heterozygotes if liver enzymes are elevated or if ferritin is &gt;1000 ug/L. <b>(Tier 2)</b></li> </ul>                                                                                                   | 4<br><br>4<br><br>4<br><br>5                                  | <input checked="" type="checkbox"/> Highly Effective<br><input type="checkbox"/> Somewhat Effective<br><input type="checkbox"/> Not Effective<br><input type="checkbox"/> Unknown |
| <b>Surveillance</b>                                                                                   | Patients should enter surveillance programs for hepatocellular carcinoma. <b>(Tier 2)</b><br><u>Asymptomatic individuals with no excess iron</u><br><ul style="list-style-type: none"> <li>C282Y/C282Y- annual monitoring and treatment when ferritin rises above normal. <b>(Tier 1)</b></li> <li>C282Y/H63D- measure iron overload indices (transferrin saturation, ferritin) every 3 years. <b>(Tier 3)</b></li> <li>C282Y hetero- measure iron indices every 5 years. <b>(Tier 3)</b></li> <li>H63D/H63D- Consider regular monitoring of iron indices. <b>(Tier 3)</b></li> </ul> May prevent progression by donating blood regularly. <b>(Tier 4)</b> | 8<br><br>4<br><br>6<br><br>6<br><br>6<br><br>7                | <input checked="" type="checkbox"/> Highly Effective<br><input type="checkbox"/> Somewhat Effective<br><input type="checkbox"/> Not Effective<br><input type="checkbox"/> Unknown |
| <b>Family management</b>                                                                              | Not applicable                                                                                                                                                                                                                                                                                                                                                                                                                                                                                                                                                                                                                                             |                                                               |                                                                                                                                                                                   |
| <b>Circumstances to Avoid</b>                                                                         | During treatment for HH avoid vitamin C & iron supplements <b>(Tier 2)</b><br>Patients should avoid mineral supplements and uncooked seafood.<br>Avoid alcohol consumption in those with hepatic involvement. <b>(Tier 4)</b>                                                                                                                                                                                                                                                                                                                                                                                                                              | 5<br><br>9                                                    | <input type="checkbox"/> Highly Effective<br><input type="checkbox"/> Somewhat Effective<br><input type="checkbox"/> Not Effective<br><input checked="" type="checkbox"/> Unknown |

## Stage II: Binning Summary

### Next Generation Sequencing (NGS) for Adults

\*Non-diagnostic, excludes newborn screening & prenatal testing/screening

| GENE/GENE PANEL: HFE                                                                                                |                                                                                                                                                                                                                                                                                                                                                                                                                                                                                                                                                                                                                                                                            | CONDITION: HFE-associated hereditary hemochromatosis (HFE-HH) |                                                                                                                                                                          |
|---------------------------------------------------------------------------------------------------------------------|----------------------------------------------------------------------------------------------------------------------------------------------------------------------------------------------------------------------------------------------------------------------------------------------------------------------------------------------------------------------------------------------------------------------------------------------------------------------------------------------------------------------------------------------------------------------------------------------------------------------------------------------------------------------------|---------------------------------------------------------------|--------------------------------------------------------------------------------------------------------------------------------------------------------------------------|
| Topic                                                                                                               | Narrative Description of Evidence (Include Tier for Questions 2-5)                                                                                                                                                                                                                                                                                                                                                                                                                                                                                                                                                                                                         | Ref                                                           | Judgment                                                                                                                                                                 |
| <b>3. What is the chance that this threat will materialize?</b>                                                     |                                                                                                                                                                                                                                                                                                                                                                                                                                                                                                                                                                                                                                                                            |                                                               |                                                                                                                                                                          |
| <b>Prevalence</b>                                                                                                   | The frequency of the C282Y polymorphism is 6.2% in the general population. Therefore, homozygosity is estimated at 0.38%. H63D polymorphisms are estimated to have an average allele frequency of 14% and S65C has an estimated frequency of 0.5%. <b>(Tier 1)</b>                                                                                                                                                                                                                                                                                                                                                                                                         | 4                                                             | <input checked="" type="checkbox"/> Known<br><input type="checkbox"/> Unknown                                                                                            |
| <b>Penetrance</b>                                                                                                   | A meta-analysis of 19 studies estimates a penetrance of 13.5% (95% CI 13.4-13.6%) for C282Y homozygosity. <b>(Tier 1)</b>                                                                                                                                                                                                                                                                                                                                                                                                                                                                                                                                                  | 4                                                             | <input type="checkbox"/> High (>60%)<br><input type="checkbox"/> Moderate (40-60%)<br><input checked="" type="checkbox"/> Low (<40%)<br><input type="checkbox"/> Unknown |
| <b>OR</b>                                                                                                           | Odds ratios for C282Y homozygosity:                                                                                                                                                                                                                                                                                                                                                                                                                                                                                                                                                                                                                                        | 10                                                            | <input checked="" type="checkbox"/> High (>3)<br><input type="checkbox"/> Moderate (2-3)<br><input type="checkbox"/> Low (<2)<br><input type="checkbox"/> Unknown        |
| <b>Relative Risk</b><br><small>(include any high risk racial or ethnic subgroups)</small>                           | <ul style="list-style-type: none"> <li>• Liver disease: 3.9 (99% CI: 1.9-8.1)</li> <li>• Hepatocellular carcinoma: 11 (99% CI: 3.7-34)</li> <li>• Hepatitis C: 4.1 (99% CI: 1.2-14)</li> <li>• Non-alcoholic liver disease: 10 (99% CI: 2.1-53) <b>(Tier 1)</b></li> </ul> *Relative risk cannot be calculated from case control studies. OR represent a good estimate of RR when disease occurrence is infrequent.                                                                                                                                                                                                                                                        |                                                               |                                                                                                                                                                          |
| <b>Expressivity</b>                                                                                                 | Penetrance is higher in male than in female C282Y homozygotes. 26% of females and 32% of males have increased serum ferritin concentrations. 19% of females and 42% of males have been found to have excess liver iron. 38-50% of homozygotes may develop iron overload. 10-33% of homozygotes eventually would develop hemochromatosis-associated morbidity. <b>(Tier 1)</b>                                                                                                                                                                                                                                                                                              | 4                                                             | <input checked="" type="checkbox"/> Known<br><input type="checkbox"/> Unknown                                                                                            |
| <b>4. How acceptable are the interventions in terms of the burdens or risks placed on the individual?</b>           |                                                                                                                                                                                                                                                                                                                                                                                                                                                                                                                                                                                                                                                                            |                                                               |                                                                                                                                                                          |
| <b>Acceptability of Intervention</b>                                                                                | Phlebotomy is generally thought to have few side effects. Harms were not reported in any studies reviewed by the USPSTF. <b>(Tier 1)</b>                                                                                                                                                                                                                                                                                                                                                                                                                                                                                                                                   | 1                                                             | <input type="checkbox"/> Very Acceptable<br><input checked="" type="checkbox"/> Mildly Acceptable<br><input type="checkbox"/> Risky or problematic                       |
| <b>5. Would the underlying risk or condition escape detection prior to harm in the setting of recommended care?</b> |                                                                                                                                                                                                                                                                                                                                                                                                                                                                                                                                                                                                                                                                            |                                                               |                                                                                                                                                                          |
| <b>Chance to escape clinical detection in Adults</b>                                                                | It is increasing unusual for individuals with HFE-HH to present with advanced clinical disease (i.e., end-organ damage secondary to iron storage). More typically individuals are determined to have biochemical hemochromatosis (i.e., elevated serum TS and elevated serum ferritin concentration) after evaluation of transferrin-iron saturation and serum ferritin concentration reveals evidence of iron overload. Occasionally, individuals with HFE-HH present whether with early clinical findings of HH such as elevated serum liver enzymes or vague nonspecific symptoms such as abdominal pain, fatigue, arthralgia, and/or decreased libido. <b>(Tier 4)</b> | 9                                                             | <input type="checkbox"/> Often<br><input checked="" type="checkbox"/> Sometimes<br><input type="checkbox"/> Rarely<br><input type="checkbox"/> Unknown                   |

## Stage II: Binning Summary

### Next Generation Sequencing (NGS) for Adults

\*Non-diagnostic, excludes newborn screening & prenatal testing/screening

#### HH Summary

**Recommendation:** Routinely report as a clinically actionable incidental finding. This recommendation is limited to individuals homozygous for the C282Y mutation in the *HFE* gene.

**Rationale:** Hemochromatosis can be a significant health condition, but has very low penetrance. Nevertheless, the estimates of relative risk from case-control studies for various serious complications are high. Interventions for people with increased iron stores are effective. Surveillance for increasing iron stores in asymptomatic C282Y homozygotes is effective in providing for early intervention. The risk for side effects or harms associated with treatment are thought to be small and outweighed by the potential benefits.

#### References

1. Whitlock EP, Garlitz BA, Harris EL, Beil TL, Smith PR. Screening for hereditary hemochromatosis: a systematic review for the U.S. Preventive Services Task Force. *Ann Intern Med.* 2006 Aug 1;145(3):209-23. PMID: 16880463
2. Schmitt B, Golub RM, Green R. Screening primary care patients for hereditary hemochromatosis with transferrin saturation and serum ferritin level: systematic review for the American College of Physicians. *Ann Intern Med.* 2005 Oct 4;143(7):522-36. PMID: 16204165
3. Neghina AM, Anghel A. Hemochromatosis genotypes and risk of iron overload--a meta-analysis. *Ann Epidemiol.* 2011 Jan;21(1):1-14. Epub 2010 Aug 30. PMID: 20800508
4. European Association For The Study Of The Liver. EASL clinical practice guidelines for HFE hemochromatosis. *J Hepatol.* 2010 Jul;53(1):3-22. PMID: 20471131
5. Bacon BR, Adams PC, Kowdley KV, Powell LW, Tavill AS. American Association for the Study of Liver Diseases.; Diagnosis and management of hemochromatosis: 2011 practice guideline by the American Association for the Study of Liver Diseases. *Hepatology.* 2011;54:328-43. PMID: 21452290
6. King C, Barton DE. Best practice guidelines for the molecular genetic diagnosis of Type 1 (HFE-related) hereditary haemochromatosis. *BMC Med Genet.* 2006 Nov 29;7:81. PMID: 17134494
7. Stuhmann M, Gabriel H, Keeney S. Clinical utility gene card for: Haemochromatosis [HFE]. *Eur J Hum Genet.* 2010 Sep;18(9). PMID: 20125190
8. Bruix J, Sherman M; American Association for the Study of Liver Diseases. Management of hepatocellular carcinoma: an update. *Hepatology.* 2011 Mar;53(3):1020-2. PMID: 21374666
9. Kowdley KV, Bennett RL, Motulsky AG. HFE-Associated Hereditary Hemochromatosis. *GeneReviews™* [Internet]. Seattle (WA): University of Washington, Seattle; 1993-. 2000 Apr 03 [updated 2012 Apr 19]. PMID: 20301613 <http://www.ncbi.nlm.nih.gov/books/NBK1440/>
10. Ellervik C, Birgens H, Tybjaerg-Hansen A, Nordestgaard BG. Hemochromatosis genotypes and risk of 31 disease endpoints: meta-analyses including 66,000 cases and 226,000 controls. *Hepatology.* 2007 Oct;46(4):1071-80. PMID: 17828789
